# Supplementary material for: Retrieval of cloud thermodynamic phase partitioning from multi-angle polarimetric imaging of Arctic mixed-phase clouds
Source: Copernicus journal article supplement (doi:10.5194/egusphere-2025-3595), 2025-09-25
Supplement: Supplementary file [file egusphere-2025-3595-AC2-supplement.pdf]

## Reply to referee #2

We thank Brent McBride for reviewing the manuscript and the valuable comments and suggestions which we address below. The responses to the referee comments are given in blue italic letters.

### Executive summary:

This work discusses a new algorithm for ice fraction derivation from multi-angle polarimetric cloud measurements from the specMACS instrument during the HALO-(AC)<sup>3</sup> campaign. The retrieval combines this data, the IDEFAX neural network forward model defined in parallel work (Weber et al. 2025), 3D Monte Carlo radiative transfer simulations from the MYSTIC routine, WRF cloud Simulations, and ERA5 re-analysis. The paper uses both intensity (I) and polarized (Q) multi-angle cloud data in two regimes: “slope”, or the region between 60-80 in scattering angle, and the “cloudbow” the region between 135 and 165 in scattering angle in the retrieval. The paper concludes that realistic Arctic clouds, simulated in 3D, compare best with retrieved ice fraction and cloud optical thickness (COT) over the specMACS field-of-view.

This paper is well-within the scope for AMT. It is valuable for current or upcoming polarimetric missions, such as PACE, 3MI, the polarimeter on CO2M, HACP, and the DPC/POSP series. It is also excellent that the authors are upfront about detection, modeling, and interpretation uncertainties. However, I ask for a potentially major and minor revision prior to publication.

### Potentially major revision:

It is unclear how above-cloud-aerosol (ACA) impacts the derivation of ice fraction at cloud top. Because this retrieval relies on a fit to Q, aerosol loading may dampen the Q-signal like ice (Alexandrov et al. 2012, section 7, figure 9). To first order, aerosols will modify the depth of I as well.

Given cloud height in the Fig. 7 and 12 domains are ~1 km at most, ACA cannot be completely ruled out – though in the Arctic, AOD is likely low. However, AOD at 0.1 and lower can have an impact on I and the depth of the primary bow signal in Q, over clouds.

Therefore, retrieved ice fraction could be overestimated relative to cloud-only simulations in the presence of ACA for “saturated” pixels. “Unsaturated” pixels may be more complex. Aerosol has a darkening effect in I over clouds in the visible, which is opposite of increasing ice fraction/COT in the paper.

The interpretation of I and Q signals is important, because ice fraction here is quantitative value, not a qualitative phase index (Reidi et al. 2010, cited in-text). The paper makes no mention of aerosol in modeling or simulation. If this has been considered, please discuss more clearly.

If not, I recommend the following:

(Most likely) Prove that the AOD in the specMACS scenes is negligible (or in other words, not a significant component of the multi-angle I or Q signals). Check the AOD from relevant satellite overpasses during HALO-AC3 or co-incident measurements from the aircraft (if those exist). If this is true (and likely is), also add discussion on how the algorithm could be adapted to address ACA impacts on ice fraction for non-clean scenes.

(Least likely) In the rare chance that AOD is not negligible, then this is a major revision. I suggest a rescope to include AOD as a retrievable parameter in the algorithm flow. To support this, show how a range of AOD impacts ice fraction retrieval with IDEFAX for  $f_{\text{ice}} = 0.2$  for unsaturated and saturated cases (since the algorithms differ). Please demonstrate with a figure.

Alexandrov, M.D., B. Cairns, C. Emde, A.S. Ackerman, and B. van Diedenhoven, 2012: Accuracy assessments of cloud droplet size retrievals from polarized reflectance measurements by the research scanning polarimeter. Remote Sens. Environ., 125, 92-111, doi:10.1016/j.rse.2012.07.012.

*Thank you very much for noting and discussing the additional influence of aerosol on the presented retrieval. Aerosol has so far not been considered, as the retrieval was developed for Arctic mixed-phase clouds where the aerosol optical thickness is typically very small, as also mentioned by you. The simulations of the synthetic data did not include aerosol. For the example observation of HALO-(AC)<sup>3</sup>, measurements of MODIS and VIIRS indicate a small aerosol optical thickness below 0.1 for 2022-04-01 in the Fram Strait region. The satellite measurements are, however, only available for clear-sky pixels. Therefore, the aerosol optical thickness above the clouds is expected to be even smaller. Compared to the other sources of uncertainty, which we analyzed in detail (3D cloud geometry and vertical ice fraction profile), the impact of above-cloud-aerosol is likely very small. Therefore, we follow your “most likely” recommendation and added a discussion about the influence of aerosol and a potential future extension and adaption of the retrieval to consider the influence of above-cloud-aerosol to the discussion at the end, but also referred to it through the paper, when appropriate.*

*“The presented phase retrieval and validation studies did not consider the influence of aerosol so far. Above-cloud-aerosol, in general, affects I as well as Q and could, for example, reduce the amplitude of the cloudbow in Q (Alexandrov et al., 2012). This would in turn lead to a small overestimation of the retrieved ice fraction. The focus of this work was on measurements of mixed-phase clouds in the Arctic, where the aerosol concentrations can generally be expected to be small and the additional uncertainty introduced by aerosol is small compared to the uncertainties due to 3D cloud geometry and the assumption of a vertical ice fraction profile. In fact, satellite measurements of the aerosol optical thickness for the shown example observation on 2022-04-01 in the Fram Strait indicate small values below 0.1 for clear-sky pixels and, therefore, the influence of above-cloud-aerosol on the retrieval results was neglected. However, for other measurements in more polluted regions, the influence of above-cloud-aerosol should be considered. To this end, additional validation and sensitivity studies should be performed. Furthermore, it could be investigated if the aerosol optical thickness, obtained e.g. from satellite measurements, could be included as an additional parameter into the retrieval.”*

*For further changes throughout the paper, please see the latexdiff.*

#### **Minor revision:**

I appreciate the attention to detail in the paper, though the many study configurations can be hard to follow at times. It will be more impactful to the reader if the authors simplify the discussion and more concisely explain:

- The cloud measurement scenarios: unsaturated vs. saturated
- The retrievals: Q-based vs. I and Q-based
- The cloud modeling schemes: plane-parallel vs. IDEFAX
- The cloud interpretation: 1D vs. 3D
- Add more details on IDEFAX instead of referring the reader to Weber et al. (2025), add a table on Volkmer et al. (2024) inputs to MYSTIC

*Thank you very much for your comments. We added additional explanations, in particular, throughout the validation part, but also extended, for example, the summary and discussion related to your in-line comments below. Moreover, we added more details to the radiative transfer simulations for the synthetic*

*data and we extended the existing description of the IDEFAX. For all changes throughout the paper draft, please see the provided latexdiff.*

**In-line comments (many related to the minor revision):**

104, 120, and elsewhere

“Observation of the cloudbow indicates the presence of liquid water and absence of the cloudbow a pure ice cloud.” (104)

“If the cloudbow is geometrically possible but not visible, the cloud consists of pure ice and the ice fraction equals to 1.” (120)

See major revision above - the Q signal may appear as pure ice, but contain a mix of ACA and ice (in general). This can change the interpretation of ice fraction.

*Thank you very much for noting that. We changed the corresponding sentences to:*

*“Observation of the cloudbow generally indicates the presence of liquid water and absence of the cloudbow a pure ice cloud.”*

*“If the cloudbow is geometrically possible but not visible, the cloud is assumed to consist of pure ice and the ice fraction is assumed to be equal to 1.”*

*In addition, we also adjusted similar statements. A more detailed discussion about the influence of aerosols is then given later in the paper.*

121

What does it mean for the polarization signal to be “saturated”? As in the top of the detector dynamic range? Or does that mean that the cloud has a COT > ~3 and therefore, “infinite” to a photon? Please explain in-text here.

I realized later on this definition is on line 215 - far too late into the paper. Please bring this up to an earlier section.

*We added an explanation what saturated in this case means and further referred to Sect. 3.4:*

*“Here, cases where the polarization signal of Q is saturated or not saturated are distinguished (see Sect. 3.4). Saturated refers here to a cloud with an optical thickness larger than about 3 to 5, such that the polarization signal is independent of the cloud optical thickness. ...”*

135

How does the Kölling et al. algorithm treat cloud sides/edges? A bit more discussion about this would be great.

*The retrieval of 3D cloud geometry by Kölling et al. (2019) is based on feature detection and stereographic reconstruction. The cloud sides/edges are not treated differently from the rest of the clouds. However, the cloud sides often exhibit sharp features compared to often more spatially homogeneous cloud centers. Thus, the feature detection works particularly well for the cloud sides. On the other hand, small mispointing errors introduce larger absolute errors to the retrieved cloud top heights for the cloud sides due to the typically steeper slopes. A detailed discussion about the uncertainties of the retrieval by Kölling et al. (2019) can be found in Volkmer et al. (2024). We added a reference to the uncertainties and Volkmer et al. (2024) to the text.*

*Volkmer, L., Pörtge, V., Jakub, F., and Mayer, B.: Model-based evaluation of cloud geometry and droplet size retrievals from two-dimensional polarized measurements of specMACS, Atmospheric Measurement Techniques, 17, 1703–1719, <https://doi.org/10.5194/amt-17-1703-2024>, 2024.*

How robust is the minimum checking on Q to instrument measurement noise?

*There is of course some influence from instrument noise. However, we detect a cloudbow depending on the difference in the measured signal depending on the standard deviation of the measurements. So, we at least partly account for the influence of instrument measurement noise. Noise will, however, likely increase the difference between the observed minimum and maximum and therefore rather falsely identify a non-existing cloudbow as a cloudbow. In this case, the computation time is increased because the phase partitioning retrieval has to be performed more often, but the retrieved ice fraction is not affected. Therefore, the cloudbow detection and following phase retrieval should be robust against noise. High instrument noise additionally leads to larger RMSEs and consequently can be detected and filtered from the results if necessary. We added a sentence mentioning the influence of instrument noise to the section about the cloudbow detection (see answer to the next comment below).*

176 (and following paragraph)

I am concerned that manual cloudbow labeling does not accurately represent the true uncertainty of the cloudbow detection, and confuses the interpretation of 3D effects and other errors in the applications later in the paper.

For example, the specMACS Q uncertainty between 3.5-6% given in Weber et al. (2024) could bury weak cloudbows in noise and add error in human interpretation. This could be where the 23.4% false detection metric is coming from.

There is evidence from this and other work (van Diedenhoven et al. (2012), and unpublished from Xu et al. on PACE/HARP2) that the ice/water detection is straightforward with multi-angle polarization statistics. As noted, the high 4% false positive metrics is likely human error as well.

Instead, I recommend a more statistical approach using Qual and RMSE metrics from Portge et al. (2023) to verify the cloudbow detection. Simple thresholds on both could differentiate real cloudbows from noise or false positives. Since the cloudbow Q fit is already part of the flow, aren't these metrics part of the calculation?

It is also valuable to have an extra category "unknown" for cloudbow cases that are ambiguous. There is a precedent for "unknown" in other cloud phase indices (esp. Reidi et al. 2010) and may clarify the results that pass RMSE minimization.

Pörtge, V., Kölling, T., Weber, A., Volkmer, L., Emde, C., Zinner, T., Forster, L., and Mayer, B.: High-spatial-resolution retrieval of cloud droplet size distribution from polarized observations of the cloudbow, *Atmos. Meas. Tech.*, 16, 645–667, <https://doi.org/10.5194/amt-16-645-2023>, 2023.

van Diedenhoven, B., A. M. Fridlind, A. S. Ackerman, and B. Cairns, 2012: Evaluation of Hydrometeor Phase and Ice Properties in Cloud-Resolving Model Simulations of Tropical Deep Convection Using Radiance and Polarization Measurements. *J. Atmos. Sci.*, 69, 3290–3314, <https://doi.org/10.1175/JAS-D-11-0314.1>.

Weber, A., Kölling, T., Pörtge, V., Baumgartner, A., Rammeloo, C., Zinner, T., and Mayer, B.: Polarization upgrade of specMACS: calibration and characterization of the 2D RGB polarization-resolving cameras, *Atmos. Meas. Tech.*, 17, 1419–1439, <https://doi.org/10.5194/amt-17-1419-2024>, 2024.

*Thank you very much for expressing this concern. As mentioned in the paper draft, the purpose of the cloudbow detection is to provide a pre-selection of the data to reduce the computation time of the phase retrieval. With the manual labelling, we wanted to give a rough estimate of the uncertainty of the cloudbow detection. We totally agree that there is an influence of measurement noise and error in human interpretation. Nevertheless, the uncertainty of the cloudbow detection is also included in the total retrieval*

uncertainty, which we quantified through the detailed validation studies. So, the manual labelling and potential uncertainties related to that do not affect the analyses and discussions later in the paper, but should only provide a rough validation of the cloudbow detection part of the retrieval. We have also thought about other ways how to perform the cloudbow detection and to validate it. This includes thresholds on the quality index and RMSE of the cloudbow retrieval, as suggested by you. However, Veronika Pörtge found in her work that a threshold-based approach on these metrics to filter signals without cloudbow from the cloudbow retrieval results did also not work perfectly. Therefore, she additionally developed a simple random forest classification algorithm to exclude signals without cloudbow from her analyses. This algorithm was, however, developed for observations with high sun in the tropics and requires the entire cloudbow range to be observed, which was not the case for the observations during HALO-(AC)<sup>3</sup> in the Arctic, and the labelling of the training data is also influenced by human interpretation. Therefore, we finally decided to use manual labelling of a significant number of cloudbow signals performed by different people. Adding an additional “unknown” category to the labels is a very good idea. However, the manual labelling was time consuming and we would be very happy if we would not have to repeat that. Anyways, we added a discussion about your concerns to the section about the validation of the cloudbow detection:

*“To reduce personal biases, the manual labeling was done by different people. Nevertheless, the manual labelling is affected by measurement noise and human interpretation. The determined accuracy of the cloudbow detection should, therefore, be interpreted as a rough estimate to prove the general applicability of the introduced cloudbow detection method. A detailed uncertainty assessment of the entire phase retrieval is carried out later in Sect. 5.”*

194

Also aerosol optical thickness (see major revision)

*Thank you very much for noting that. We have not added the aerosol optical thickness here, since it is not yet part of the forward operator. However, we added an additional explanation in the discussion section, mentioning that the aerosol optical thickness could and should be included as an additional parameter in the future.*

214

Add to the end “since ice clouds are brighter than liquid clouds, in our simulated cases.”

*Changed as suggested.*

221 and elsewhere through the paper

All mentions of “reflectivity” should be “reflectance”.

*The second reviewer actually asked us, to refer to reflectivity instead of reflectance. The use of reflectance and reflectivity differs between different publications. Since reflectivity was also used in the already published paper about the IDEFAX, we would like to use reflectivity instead of reflectance to be consistent.*

220

Figures 1 and 3 show that the change in Q at different COD is nowhere near the same magnitude as the change in I, but ice fraction changes to Q happen almost independently to COD.

The consequence of a combined, equally weighted RMSE for I and Q in unsaturated cases is that the “winning solution” for ice fraction may overemphasize a good I comparison over Q, where the distinct information content is.

This may explain why biases in measured vs. modeled ice fraction persist in the Figure 10f histograms for in the cloudbow range retrieval - and also why the COD retrieval compares well on 11f.

I recommend considering an error-normalized metric instead, such as:

$$\chi = (1 - w_Q) \frac{I_{meas} - I_{model}}{RMSE_{I, meas-model}} + w_Q \frac{Q_{meas} - Q_{model}}{RMSE_{Q, meas-model}} \quad (1)$$

where  $w_Q$  is an empirical weight on  $Q$ . This form allows  $Q$  to directly compensate for measurement-model differences in  $I$ .  $w_Q$  may be effective at 0.5, but may need fine tuning to emphasize the independent information content in  $Q$  relative to ice fraction.

*Thank you very much for your suggestion towards an improved metric for the optimization! We also noticed that the changes in  $I$  and  $Q$  depending on the optical thickness and ice fraction are not of similar magnitude and that the error metric has to be chosen carefully in order to not prefer the optimization of one variable over the other. During the retrieval development, we tested several different metrics, including weighted means of the differences for  $I$  and  $Q$ , similar to your suggestion above. The product form, we present in the paper was finally chosen since it showed the best results based on test with synthetic data. By using the product form, we avoid the problem of different magnitudes. In addition, we added small numbers to account for cases where one of the errors is very small such that the other value could be chosen arbitrarily. Nevertheless, there might still be more optimal solutions than the one we found. We added some more information about our choice to the corresponding section:*

*“Different error metrics for the optimization were tested, including commonly used weighted sums of the RMSE of  $I$  and  $Q$ . The product form for the combined RMSE was finally chosen since it showed the best results. Nevertheless, other improved optimization metrics could be tested and incorporated in the future.”*

250

Of the two cases shown in Figure 4, neither is labeled as “homogeneously mixed”. Do you mean “linearly distributed”?

*There are, in general, two extreme cases for the phase partitioning in Arctic mixed-phase clouds. The first one is a completely homogeneously mixed cloud. In that case, the vertical attribution of the retrieved ice fraction is irrelevant since the ice fraction throughout the cloud is constant and the penetration depth does not matter. The second case is a cloud with completely spatially separated phases with a liquid water layer on top of an ice layer. In this case, the vertical optical thickness to which the signal is sensitive to matters. The two cloud cases shown in Fig. 4 are used to quantify this vertical optical thickness threshold, which would not be possible with a homogeneously mixed cloud.*

Figure 8

The terms “cloudbow” and “slope” for the third column histograms were not immediately obvious. Please describe this more explicitly like:

“(c, f) Histogram of the differences between retrieved and model ice fractions with mean and standard deviation calculated from analysis performed in the cloudbow scattering angle range (blue) and forward scattered slope range (orange)”

And also please harmonize other figures that may have similar discussion.

*Changed as suggested.*

350

I strongly suggest adding 2-panel figure that shows spatially, over the specMACS domain:

- The cloud pixels that correspond to the slope range retrieval, and which ones to the cloudbow range retrieval
- The cloud pixels that undergo the saturated retrieval (Q only) and which ones go through the unsaturated retrieval (I and Q).

I am curious if these distributions can help explain some of the spatial variation in the 3D study row of Figure 8 (d,e,f). This will also support discussion on errors (line 354 - 385).

*Thank you very much for noting that! The information is actually already included in the plots, but it was not discussed in detail so far. The retrieval results shown in the upper left part of panels (a,b,d,e) of Fig. 8 and similar figures correspond to the slope angular range, the results in the lower right part are for the cloudbow range. This information is already given in the figure captions and also mentioned in the text, for example, during the explanation of Fig. 8. A comparison of Fig. 8 and 9 further shows, which pixels go through the saturated and which through the unsaturated retrieval. Pixels where only the ice fraction was derived correspond to a saturated polarization signal. Pixels with both retrieved ice fraction and optical thickness have unsaturated polarization signals. We added more discussion about that to the text.*

*“... The retrieved values in the lower right of the images correspond to the cloudbow range and the values in the upper left part to the slope range... The optical thickness is only retrieved at the cloud edges, where the clouds are optically thinner and the polarization signal is not saturated. Hence, pixels showing both a retrieved ice fraction and optical thickness in Fig. 8 and 9 have an unsaturated polarization signal and undergone the combined retrieval using I and Q. Pixel with a retrieved ice fraction and without a retrieved optical thickness correspond to pixels with a saturated polarization signal for which the ice fraction is directly derived from Q.”*

#### Summary section

Given that the realistic 3D cloud simulations compare the best against specMACS data - of the four retrieval combinations: unsaturated slope, unsaturated cloudbow, saturated cloudbow, saturated slope - which are the most valuable and which are least effective? It is clear from Figure 13 that they may create different results and it would be excellent to summarize under what conditions they succeed and aren't as useful.

*We added an additional summary concerning the cloudbow and slope angular ranges and the saturated and unsaturated polarization signals to the summary:*

*“Generally, the retrieval using the cloudbow angular range is more accurate than the retrieval using the slope angular range, as the cloudbow range is more sensitive to the cloud thermodynamic phase and more strongly dominated by single scattering, and should therefore be preferred if the observation of the cloudbow is geometrically possible. In addition, the uncertainty of the retrieval results for saturated polarization signals is higher than for unsaturated signals. In the former case, the ice fraction can directly be derived from measurements of Q, whereas in the latter a combined retrieval using I and Q has to be applied. I is more strongly affected by 3D radiative effects than Q, and additionally the signals of I and Q originate from different penetration depths within the cloud, which increases the uncertainty of the derived ice fraction.”*
